# Supplementary material
Source: PubMed Central journal article supplement (PMC11027632)

# Supplementary Fig. 1

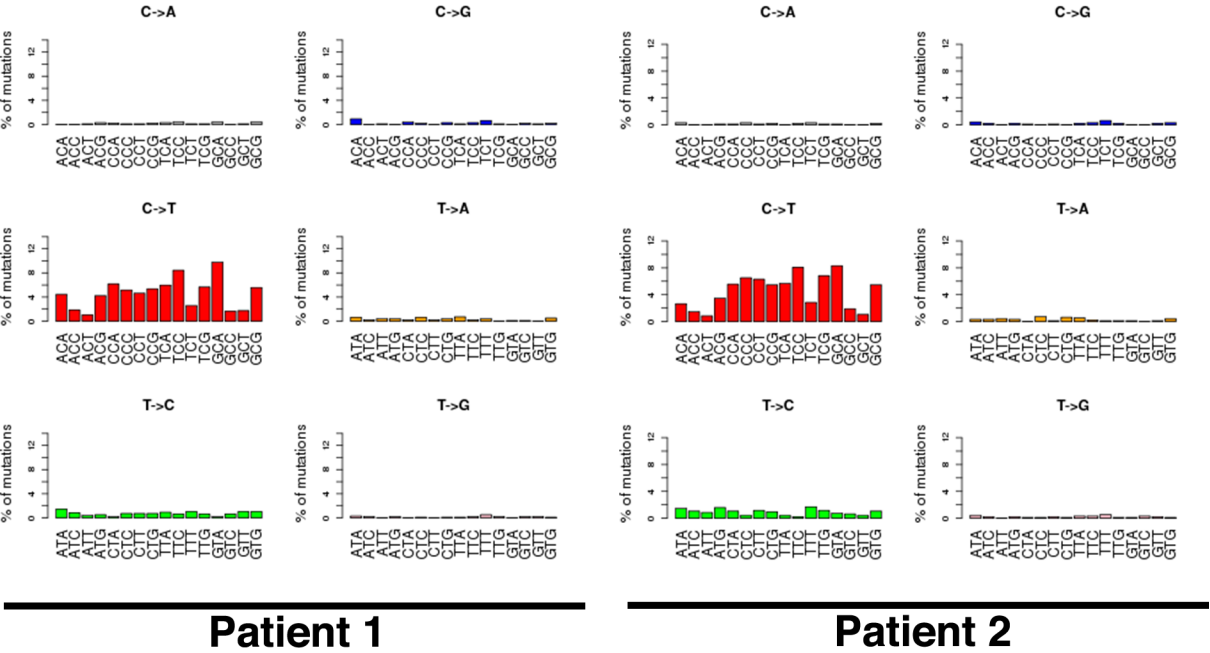

Supplement: 262_2020_2587_MOESM1_ESM.pdf [file 262_2020_2587_MOESM1_ESM.pdf]
