# Supplementary material
Source: PubMed Central journal article supplement (PMC11027632)

# Supplementary Fig. 2

**a H&E Patient 1**

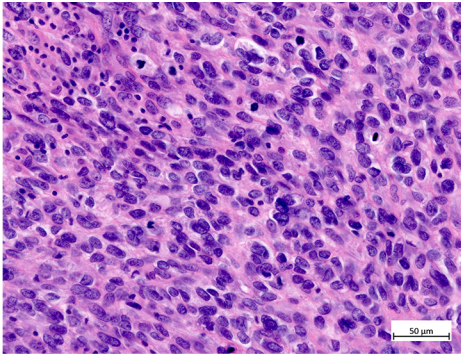

**H&E Patient 2**

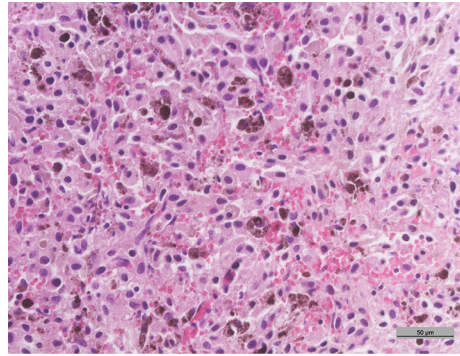

**b CD8 Patient 1**

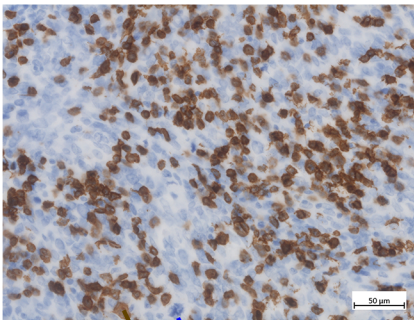

**CD8 Patient 2**

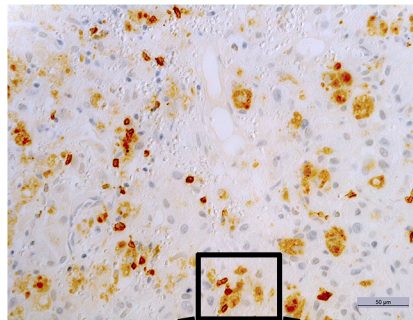

**CD8 (red) Patient 2**

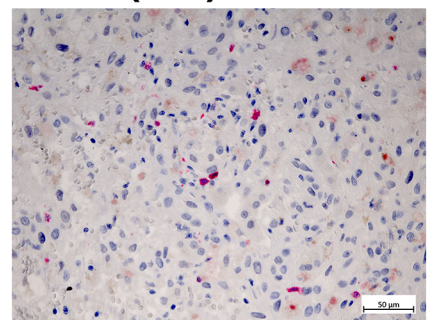

— Tumor cell (not pigmented)  
— CD8+ T cell

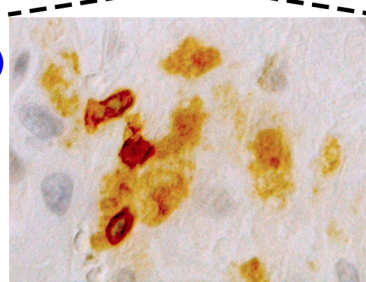

— Tumor cell (pigmented)  
— CD8+ T cell  
— CD8+ T cell  
— Tumor cell (pigmented)

**c PD-L1 Patient 1**

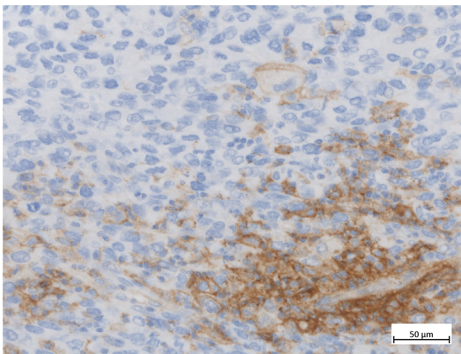

**PD-L1 Patient 2**

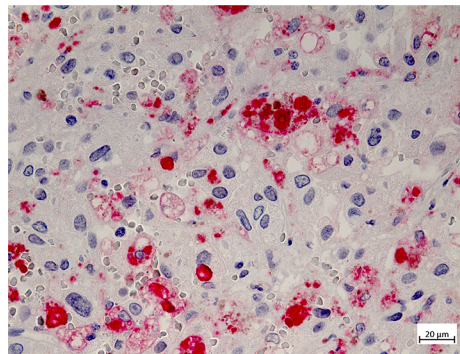

Supplement: 262_2020_2587_MOESM2_ESM.pdf [file 262_2020_2587_MOESM2_ESM.pdf]
