# Supplementary material
Source: PubMed Central journal article supplement (PMC11027632)

### Supplementary Fig. 3

**a Patient 1**

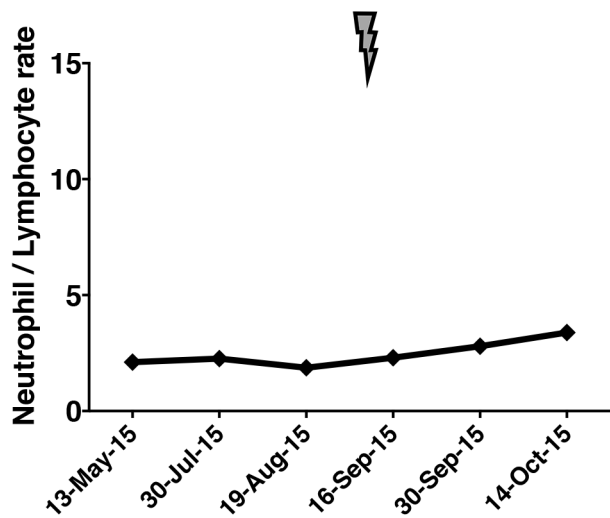

**b Patient 2**

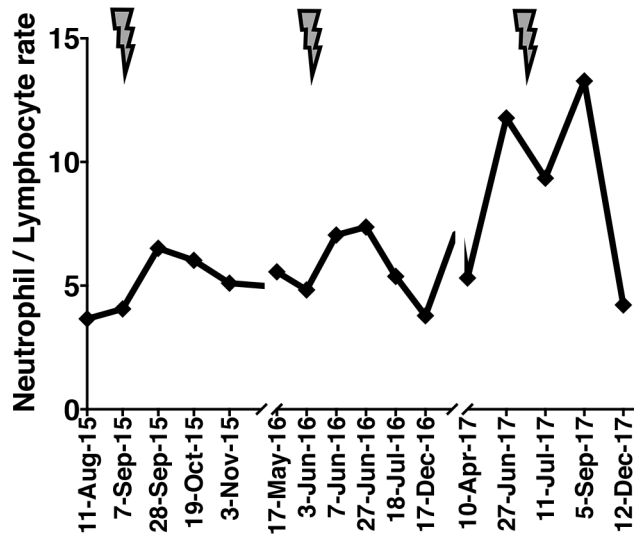

Supplement: 262_2020_2587_MOESM3_ESM.pdf [file 262_2020_2587_MOESM3_ESM.pdf]
